# Supplementary material for: Ultrasensitive detection of orthophosphate ions with reduced graphene oxide/ferritin field-effect transistor sensors
Source: Royal Society of Chemistry journal article supplement (doi:10.1039/c6en00661b), 2017-01-01
Supplement: c6en00661b1.pdf [file c6en00661b1.pdf]

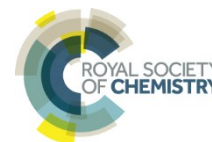

Electronic Supplementary Information (ESI)

Ultrasensitive Detection of Orthophosphate Ions with Reduced Graphene Oxide/Ferritin Field-effect Transistor Sensors

Shun Mao,<sup>ab</sup> Haihui Pu,<sup>a</sup> Jingbo Chang,<sup>a\*</sup> Xiaoyu Sui,<sup>a</sup> Guihua Zhou,<sup>a</sup> Ren Ren,<sup>a</sup> Yantao Chen<sup>ac</sup> and Junhong Chen,<sup>a\*</sup>

<sup>a</sup> Department of Mechanical Engineering, University of Wisconsin-Milwaukee, 3200 N. Cramer Street, Milwaukee, WI 53211, USA

<sup>b</sup> State Key Laboratory of Pollution Control and Resource Reuse, College of Environmental Science and Engineering, Tongji University, 1239 Siping Road, Shanghai 200092, China

<sup>c</sup> Tianjin Key Laboratory for Photoelectric and Devices, School of Materials Science and Engineering, Tianjin University of Technology, Tianjin 300384, China

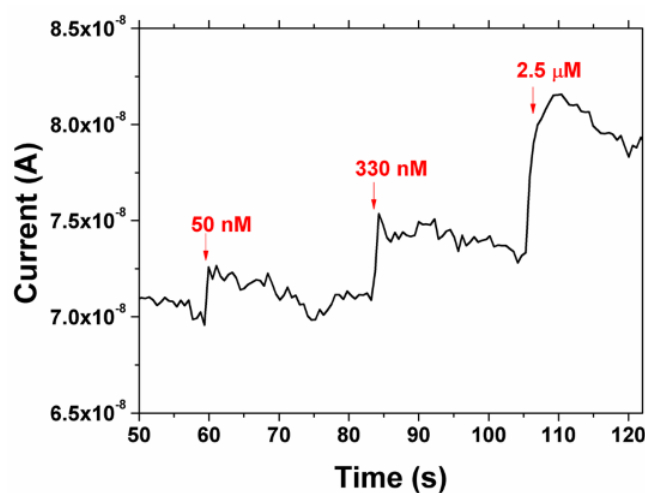

<sup>a</sup> Department of Mechanical Engineering, University of Wisconsin-Milwaukee, 3200 N. Cramer Street, Milwaukee, WI 53211, USA. E-mail: jhchen@uwm.edu (J. Chen), chang69@uwm.edu (J. Chang)

<sup>b</sup> State Key Laboratory of Pollution Control and Resource Reuse, College of Environmental Science and Engineering, Tongji University, 1239 Siping Road, Shanghai 200092, China

<sup>c</sup> Tianjin Key Laboratory for Photoelectric and Devices, School of Materials Science and Engineering, Tianjin University of Technology, Tianjin 300384, China

† Electronic Supplementary Information (ESI) available: sensing response of another sensor without probe linker; control sensing test of the sensor without probe; pH impact study; and sensor recycling study.

**Figure S1.** Dynamic sensing responses of another typical sensor without probe linker.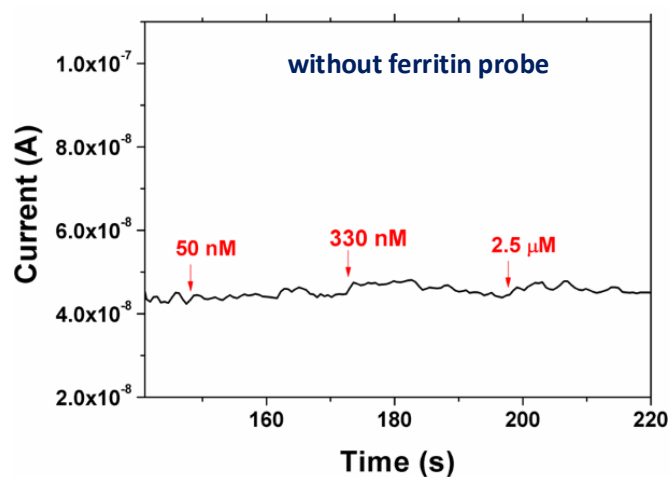**Figure S2.** Control sensing test of a sensor without ferritin probe. The sensor without probe shows negligible responses to  $\text{HPO}_4^{2-}$ .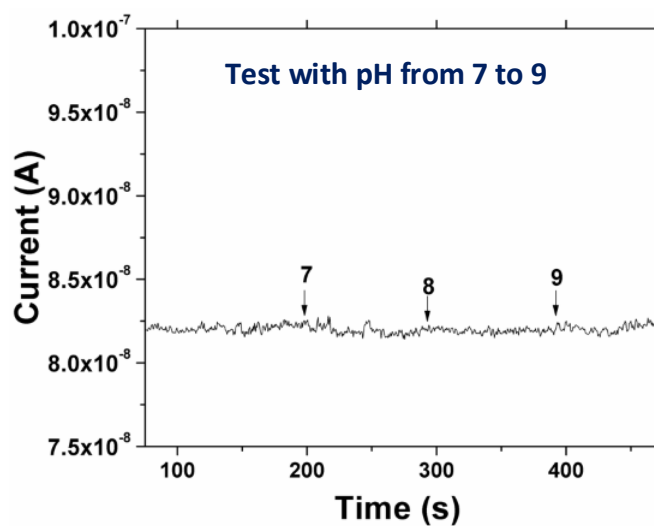**Figure S3.** Sensor responses to control water solutions with a pH from 7 to 9. The sensor has no responses to pH in this range, which indicates that the sensor is stable for  $\text{HPO}_4^{2-}$  sensing in a weak basic condition.

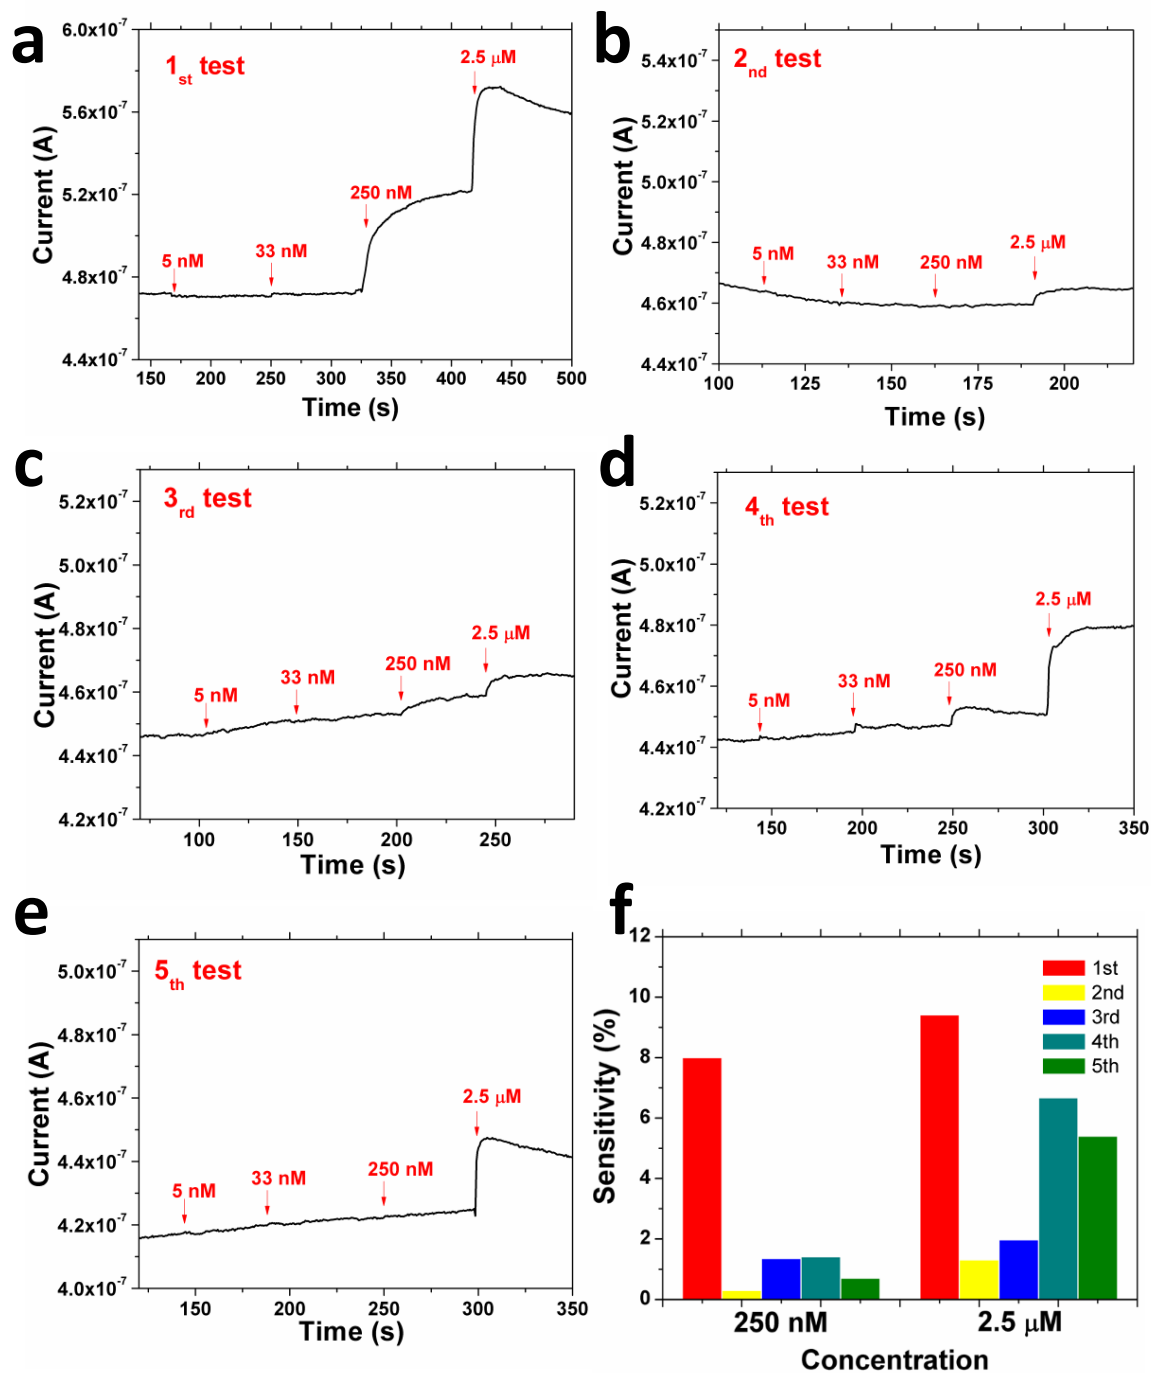

**Figure S4.** (a-e) Recycling tests of the rGO/ferritin sensor. The sensor was tested for five times with a probe recovery treatment in an NaOH and NaCl solution between each test. (f) Sensitivity summary of the sensor to 250 nM and 2.5 μM HPO<sub>4</sub><sup>2-</sup> in each test.
